# Supplementary material for: Change of pH indicator’s pKa value via molecular imprintingElectronic supplementary information (ESI) available: adsorption isotherms, schematic of experimental setup, FTIR spectra of doped sol–gel glasses, SAXS curves, UV–vis spectra of TD-MR and its protonated form, structure of TD-MR, comparison of template environments, SEM images and photograph of imprinted and nonimprinted sol–gel glasses. See http://www.rsc.org/suppdata/cc/b2/b203496d/
Source: Royal Society of Chemistry journal article supplement (doi:10.1039/b203496d), 2002-06-27

## Supporting Materials

Isotherm

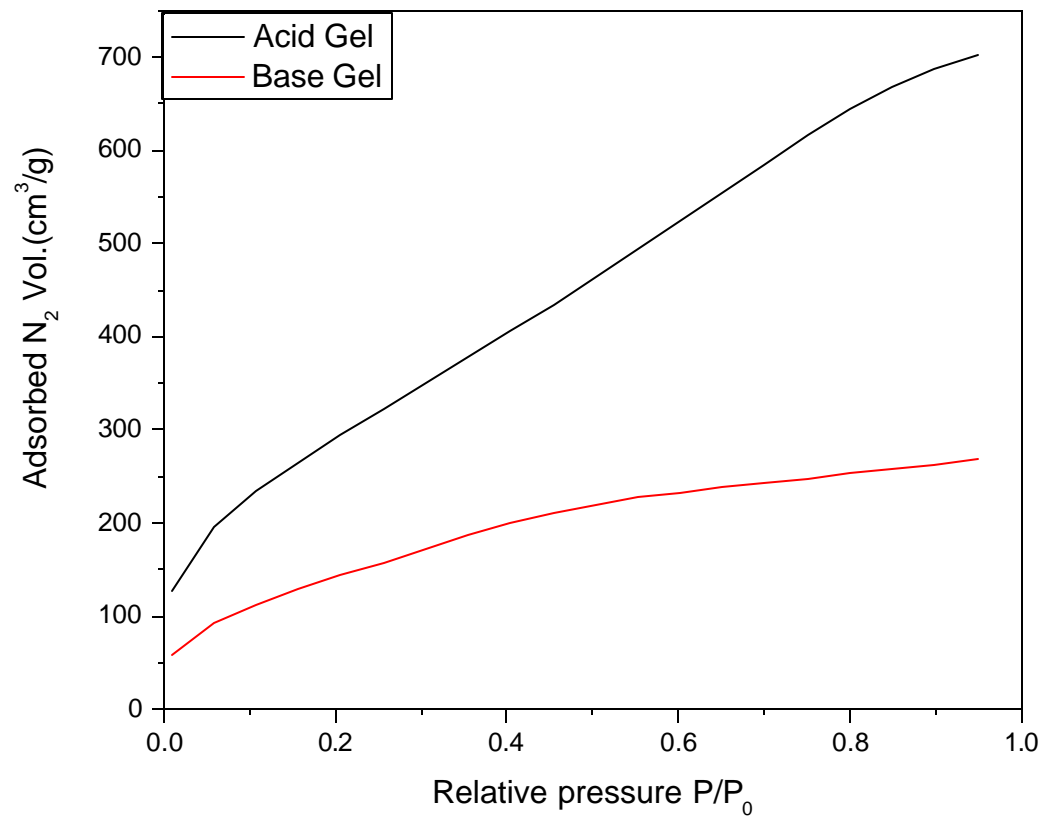

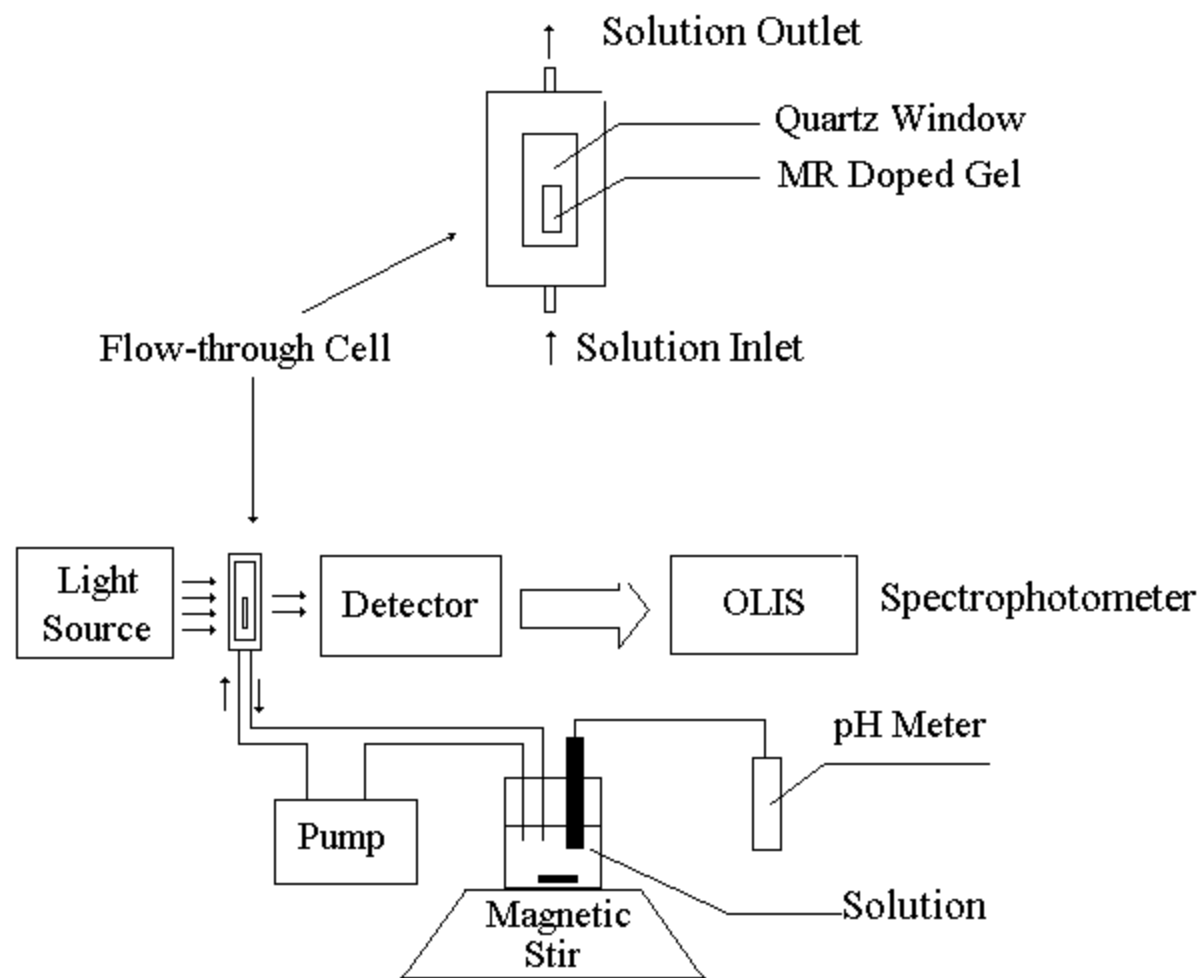

Schematic diagram of experimental setup for measurement of optical spectral variation with pH.

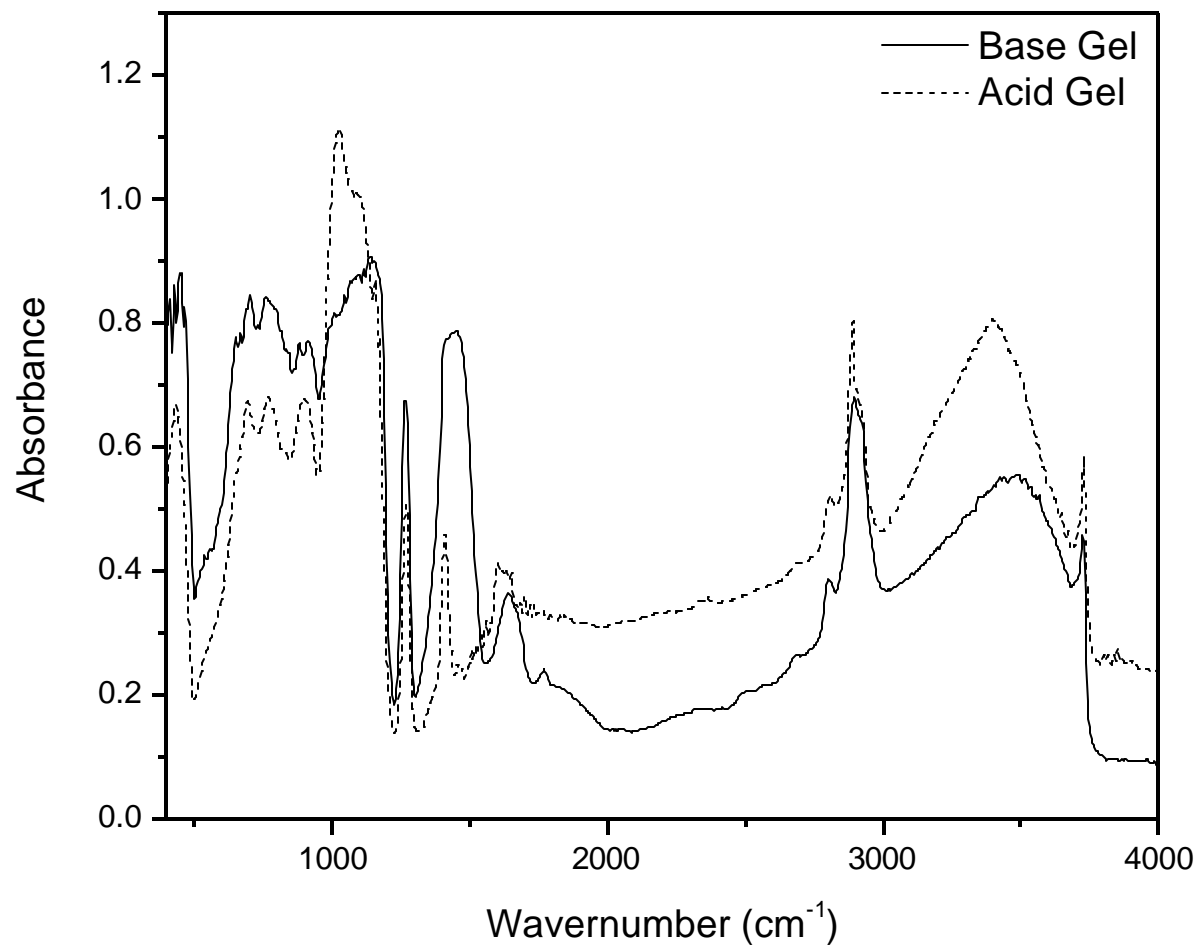

FTIR spectra of sol-gel glasses doped with the indicator.

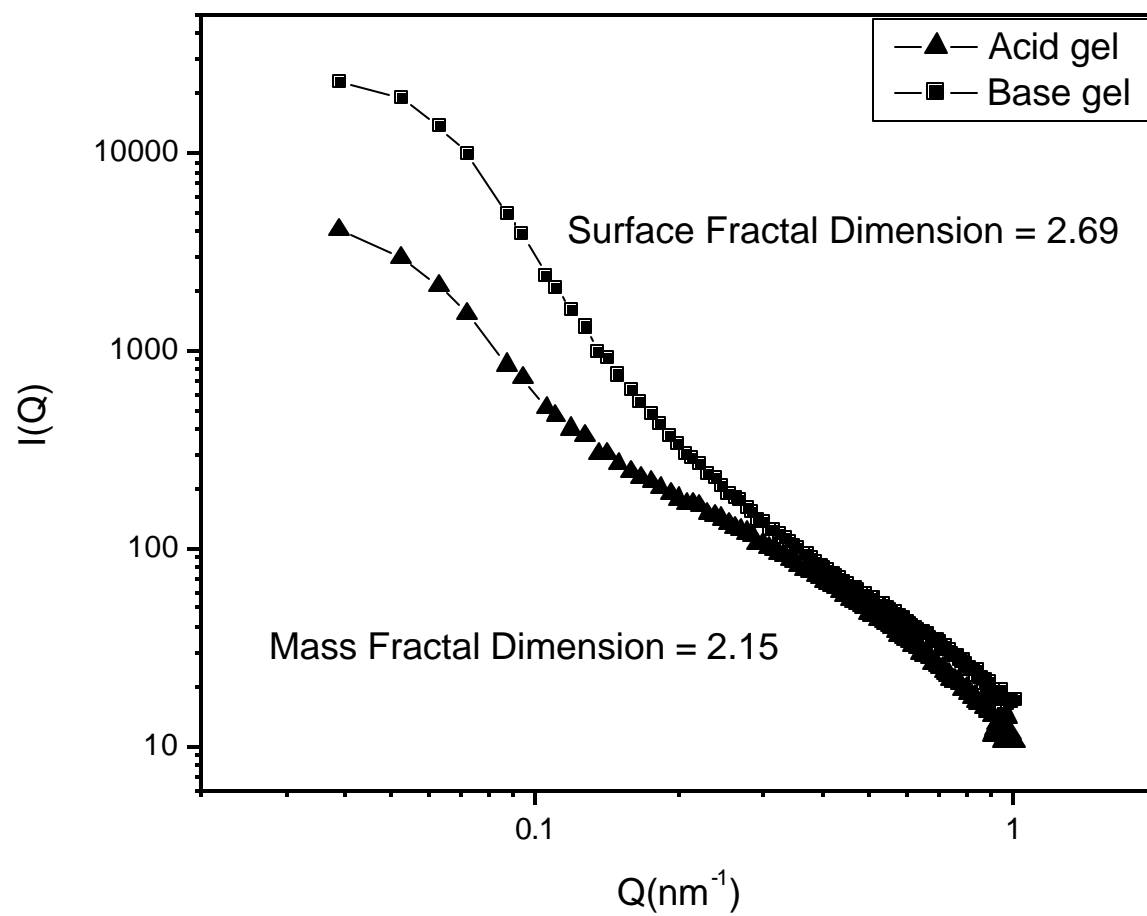

Small-angle X-Ray Scattering (SAXS) Curves

Optical spectra of TD-MR and protonated TD-MR in aqueous solutions.

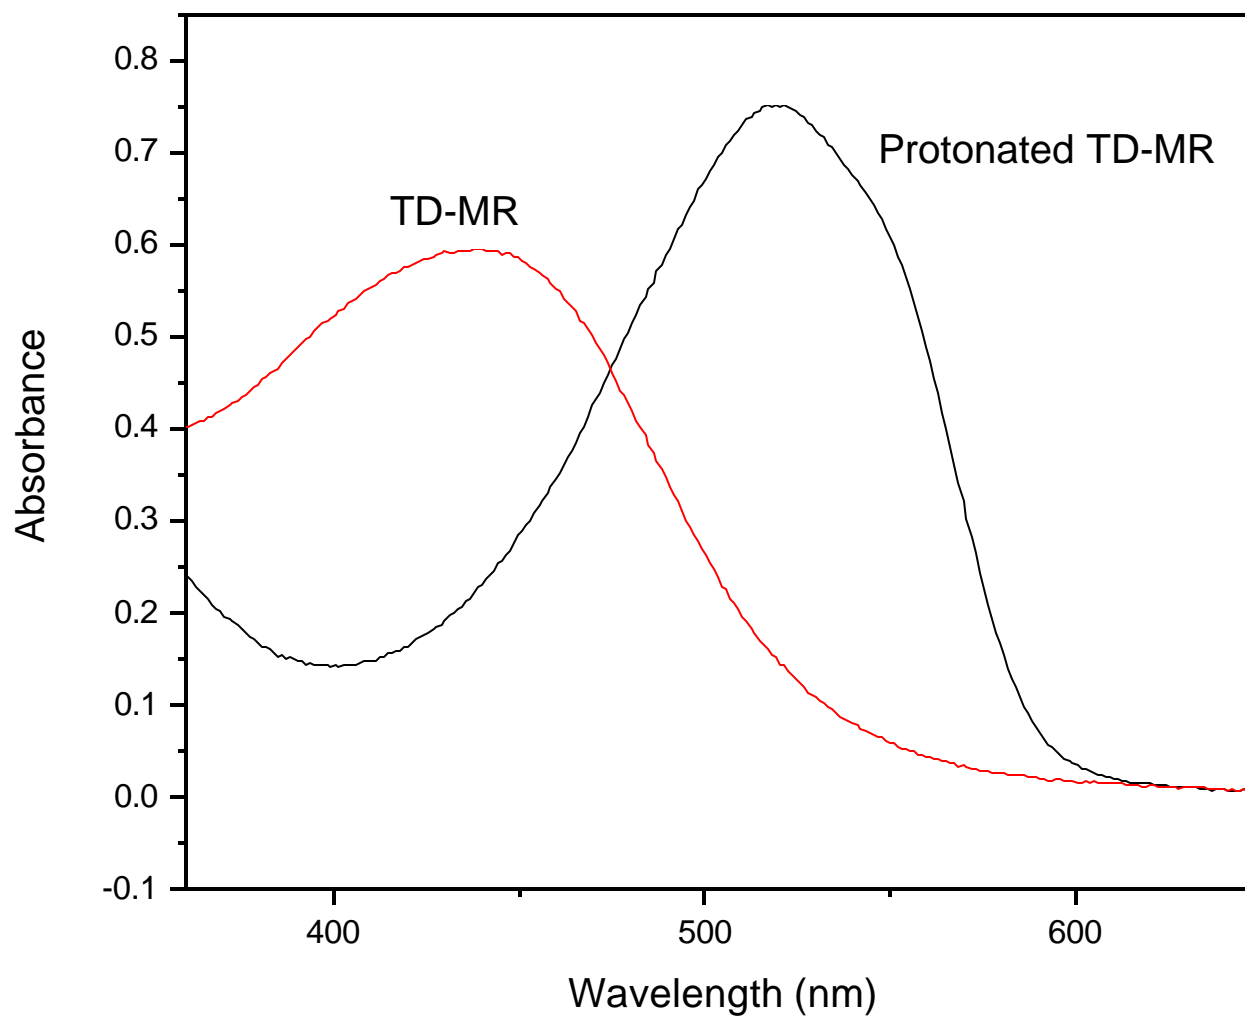

Structure of trimethoxysilylpropylamide derivative  
of methyl red (TD-MR)

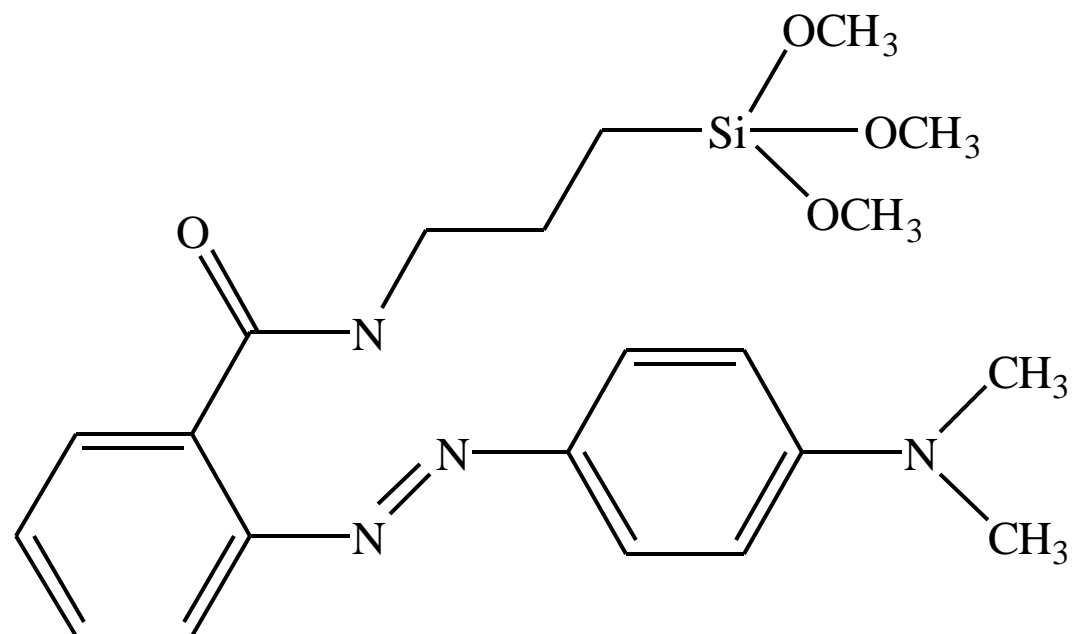

Comparison of two different local environments generated by (a) plain indicator template and (b) protonated indicator template.

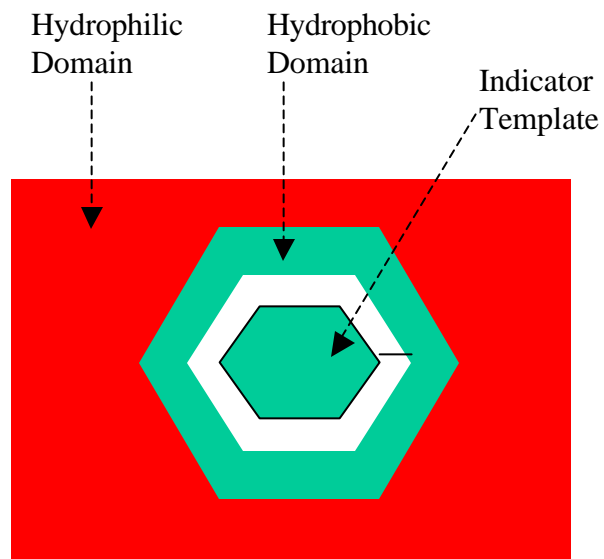

a

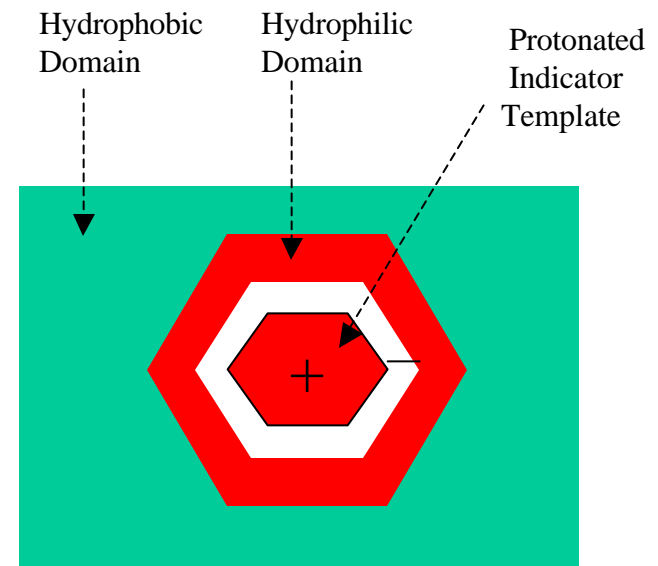

b

## SEM Images of Imprinted and Nonimprinted Samples

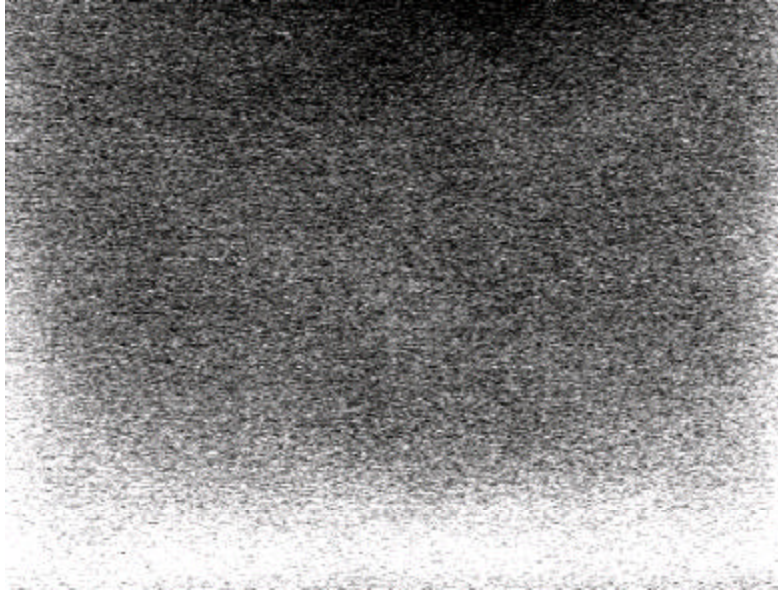

Base-Catalyzed Gel

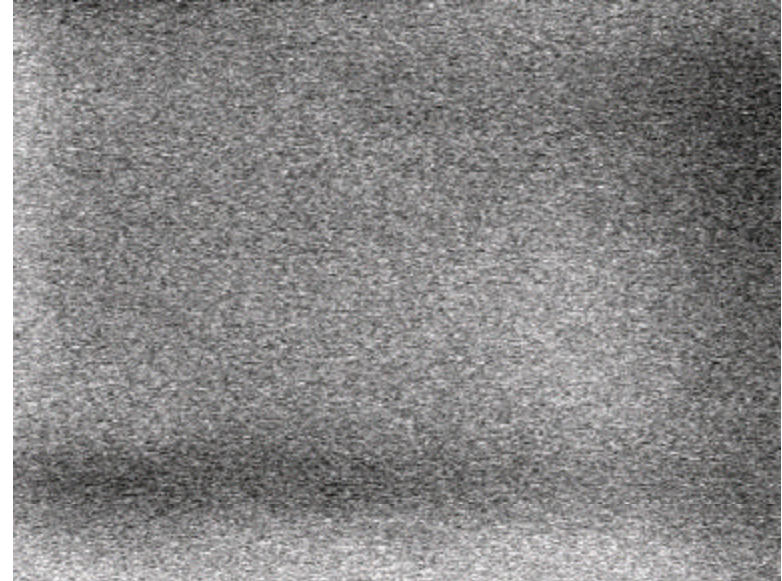

Acid-Catalyzed Gel

Photograph of imprinted and nonimprinted sol-gel glasses in a buffer solution with  $\text{pH} \approx 5.8$ . The different colors of the glasses indicate that the same indicator has different  $pK_a$  values in the imprinted and nonimprinted samples.

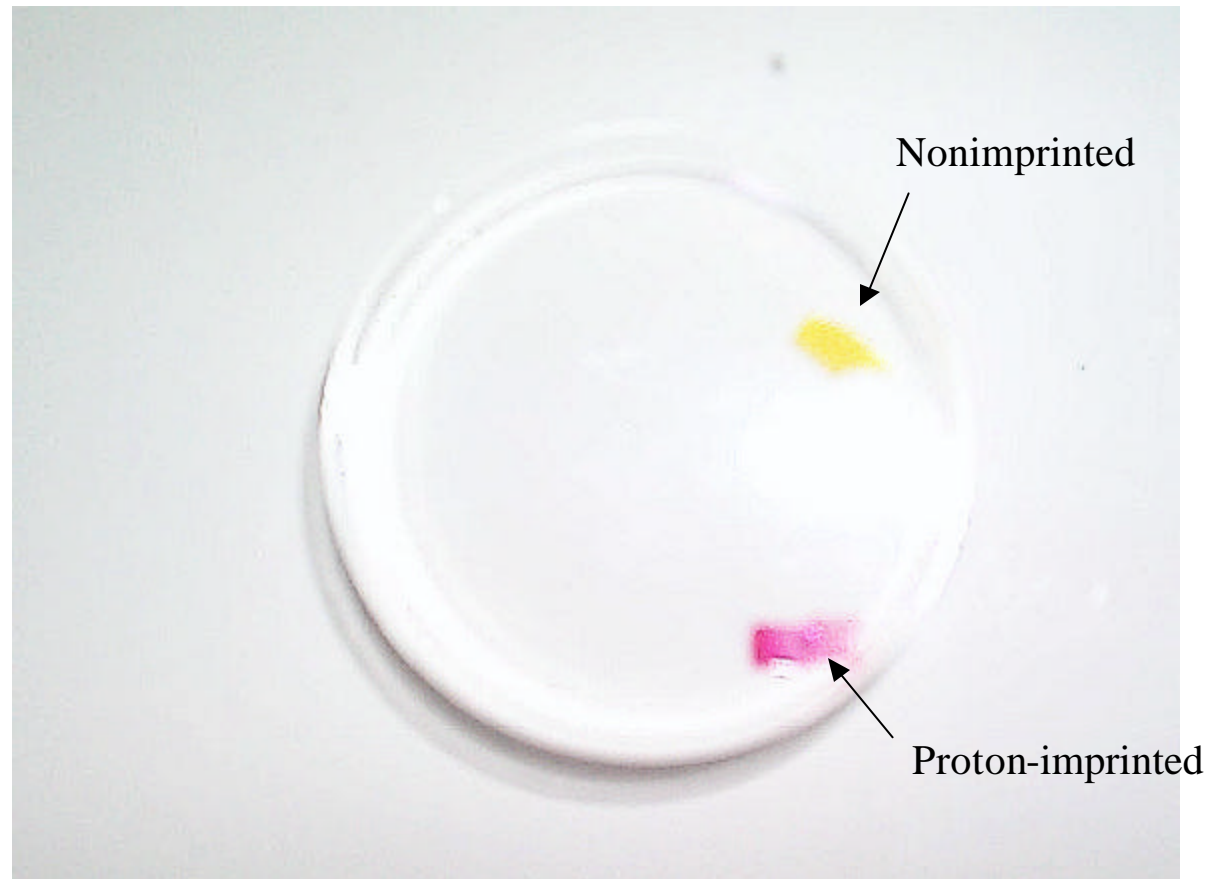

Supplement: b203496d.pdf [file b203496d.pdf]
